# Supplementary material for: An Integrative Multi-scale Analysis of the Dynamic DNA Methylation Landscape in Aging
Source: PubMed Central journal article supplement (PMC4334892; doi:10.1371/journal.pgen.1004996), 2015-02-18
Supplement: pgen.1004996.s001.pdf [file pgen.1004996.s001.pdf]

## **Supplementary Information for:**

### **An integrative multi-scale analysis of the dynamic DNA methylation landscape in aging**

Yinming Jiao<sup>1,\$</sup>, Tian Yuan<sup>1,\$</sup>, Stephan Beck<sup>2</sup>, Simone de Jong<sup>3</sup>, Roel A. Ophoff<sup>3</sup> and Andrew E. Teschendorff<sup>\*,1,4</sup>

<sup>1</sup> CAS-MPG Partner Institute for Computational Biology, Chinese Academy of Sciences, Shanghai Institute for Biological Sciences, 320 Yue Yang Road, 200031 Shanghai, China. <sup>2</sup>Medical Genomics Group, Paul O'Gorman Building, UCL Cancer Institute, University College London, 72 Huntley Street, London WC1E 6BT, United Kingdom. <sup>3</sup>Center for Neurobehavioral Genetics, 695 Charles E. Young Drive South, 4335B Gonda, Box 951761, Los Angeles, California 90095-1761, USA. <sup>4</sup>Statistical Genomics Group, Paul O'Gorman Building, UCL Cancer Institute, University College London, 72 Huntley Street, London WC1E 6BT, United Kingdom.

<sup>\$</sup> Equal Contribution

<sup>\*</sup>Corresponding Author: [andrew.teschendorff@ucl.ac.uk](mailto:andrew.teschendorff@ucl.ac.uk)

### **SUPPLEMENTARY FIGURES:**

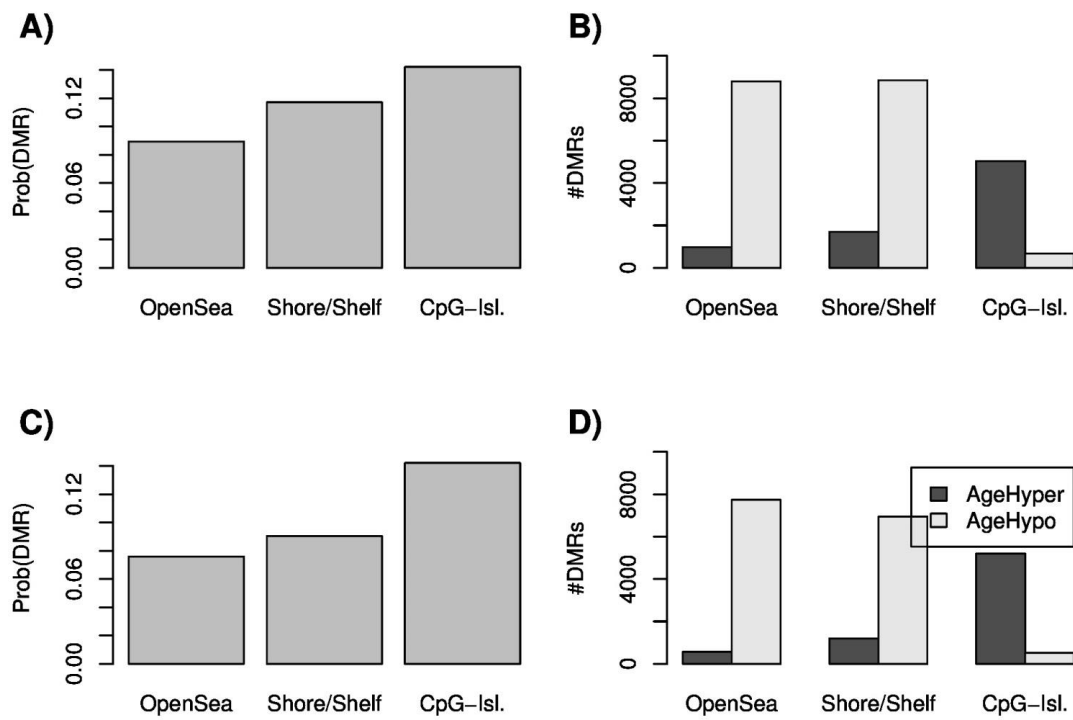

**Fig.S1:** **A)** Probabilities that a randomly picked open-sea, shore/shelf and CpG-island region is an age-DMR (defined as those passing the Bonferroni threshold). **B)** Relative numbers of age-hypermethylated and age-hypomethylated DMRs within each regional class. **C)** As A) but now for age-DMRs derived using the reference-based method of Houseman et al, which adjusts for putative changes in blood cell subtype proportions. **D)** As B), but now for the RefBased adjusted analysis.

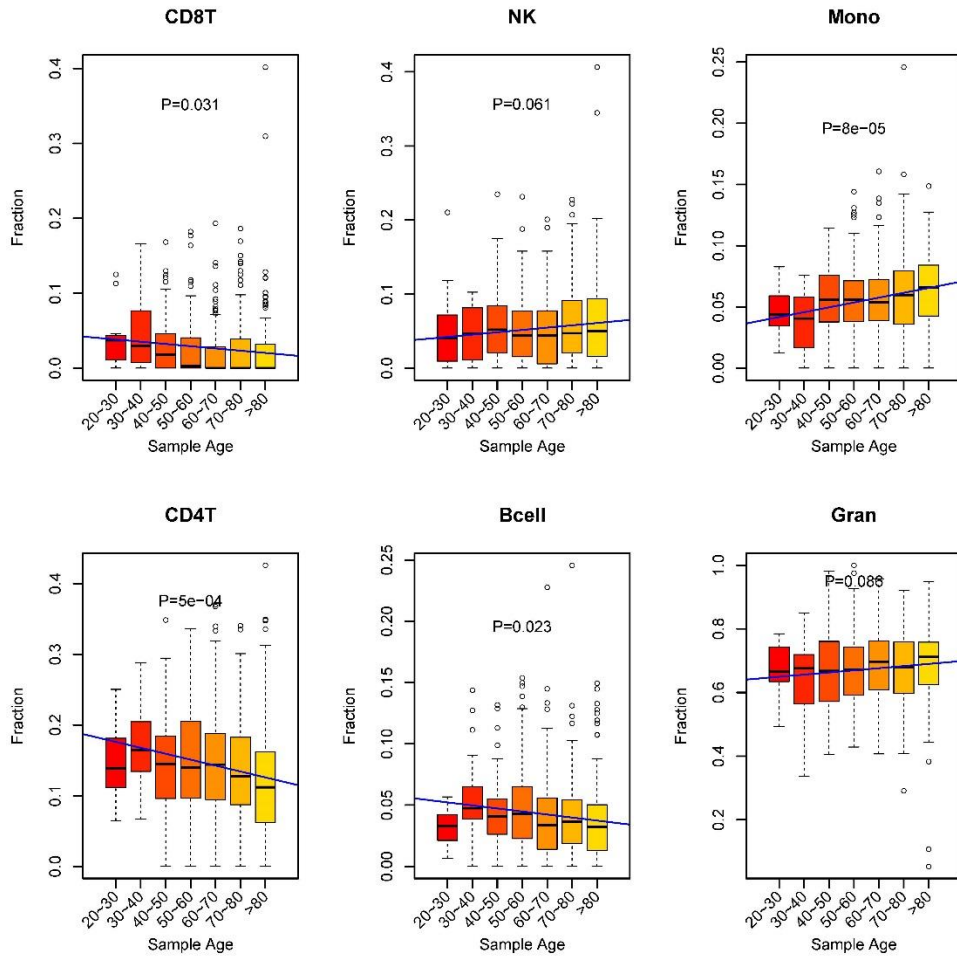

**Fig.S2:** Boxplots showing the change in cell proportions as a function of age in Hannum et al DNAm data. Each plot represents one blood cell subtype, and samples have been binned into age-groups for ease of visualization. A linear regression line and P-value has been added to each plot.

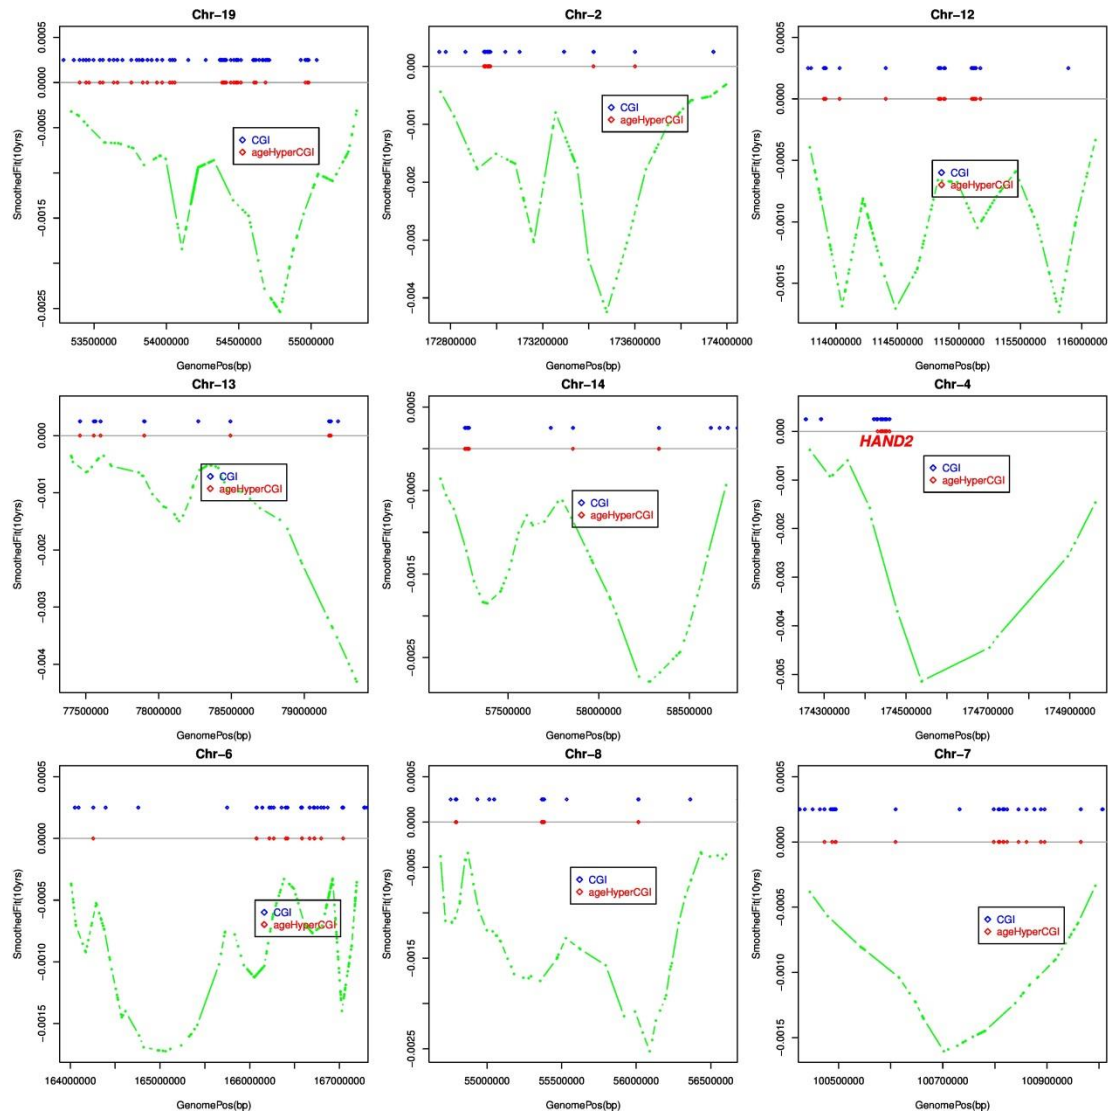

**Fig.S3:** Nine age-associated hypomethylated blocks, strongly enriched for CGIs undergoing age-associated hypermethylation. Green curve represents the fit of the bump hunter algorithm, indicating the methylation change for an increase of 10 age-years. Blue dots represent CpG islands located within the blocks. Red dots indicate those CpG islands which are significantly hypermethylated. Observe how most blocks contain many well separated age-hypermethylated CGIs, although some blocks (e.g. the one mapping to chr-4 and which contains the *HAND2* gene) are enriched because of many neighboring CGIs becoming hypermethylated.

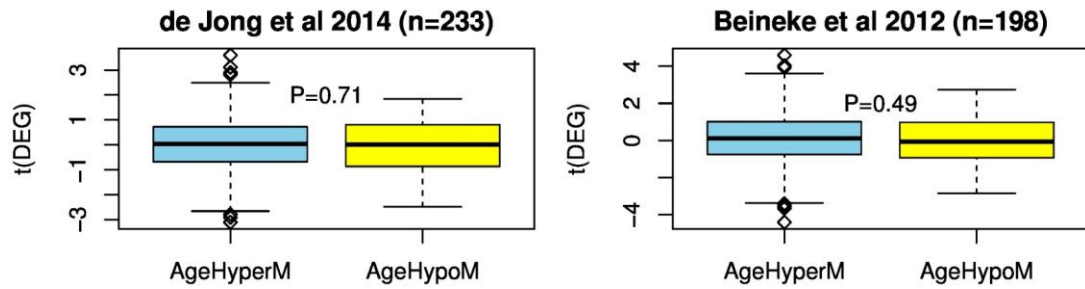

**Fig.S4:** Statistics of differential gene expression in blood (y-axis) for genes with promoters undergoing significant age-associated hyper or hypomethylation (in blood), respectively. Age-DMRs were restricted to regional probe clusters mapping to CGIs and within 200bp of the TSS or 1<sup>st</sup> Exon. P-value is from a two-tailed Wilcoxon rank sum test. The blood gene expression data sets are from de Jong et al 2014 and Beineke et al 2012, as indicated, the blood DNA methylation data set is from Hannum et al. (see paper for references).

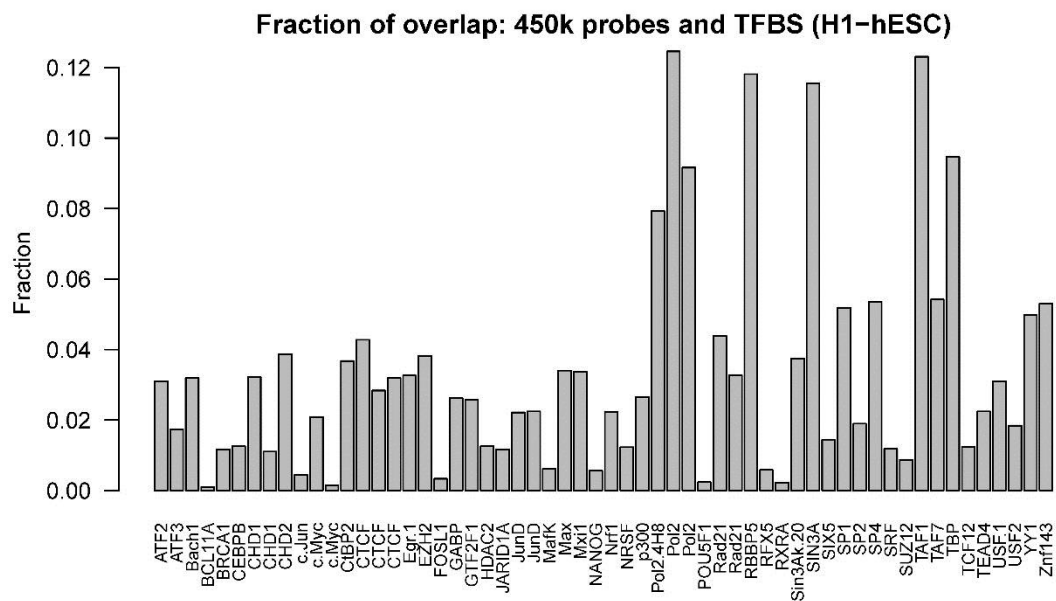

**Fig.S5:** The average fraction of 450k probe CpGs mapping within a binding site of one of the 58 TFs in H1-HESC.

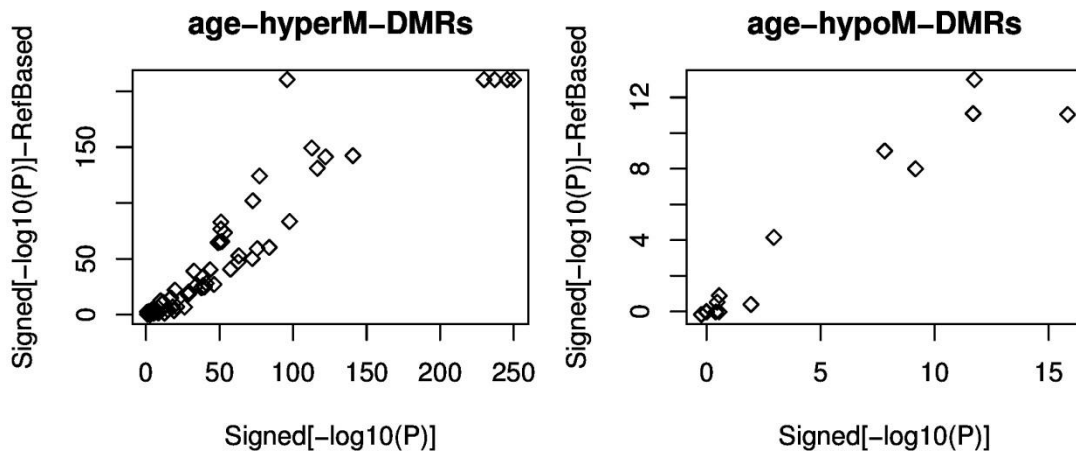

**Fig.S6:** Scatterplot of the signed  $-\log_{10}$  P-values of enrichment between the unadjusted and Reference-based analysis among age-hypermethylated and age-hypomethylated DMRs, as indicated. Observe how transcription factors with enriched binding sites among the age-DMRs in the unadjusted analysis remain generally significantly enriched in the Reference-Based adjusted analysis, suggesting that adjustment for changes in blood cell subtypes does not substantially affect the TFBS enrichment analysis, at least not for the TFs considered here.

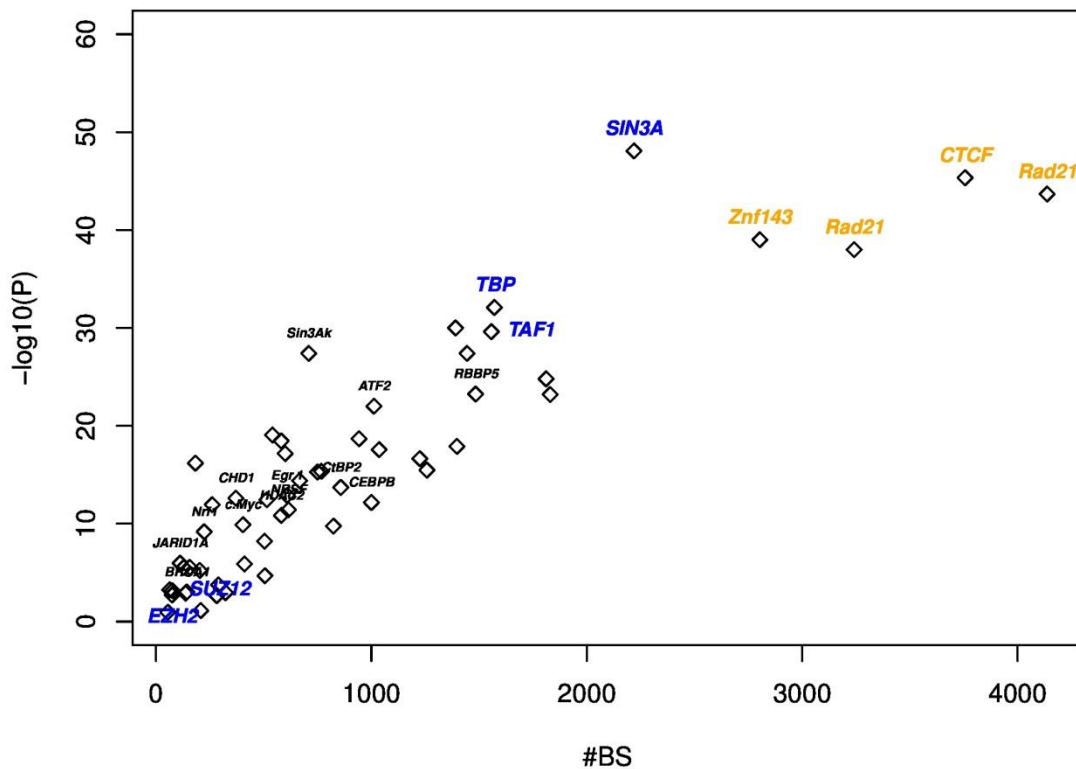

**Fig.S7:** Scatterplot of  $-\log_{10}$  P-values of enrichment of TFBSs within age-associated hypomethylated blocks (y-axis) against the number of binding sites within open sea regions (#BS, x-axis) for TF ChIP-Seq binding profiles as obtained in the H1-hESC line. In blue we indicate some of the TFs with binding sites enriched among the age-hypermethylated DMRs,

whereas in orange we indicate a number of TFs with binding sites enriched among the age-hypomethylated DMRs. Observe how specific TFs like SIN3A or TBP, which have BSs enriched among age-hyperM DMRs, have BSs also enriched within age-associated hypomethylated blocks.

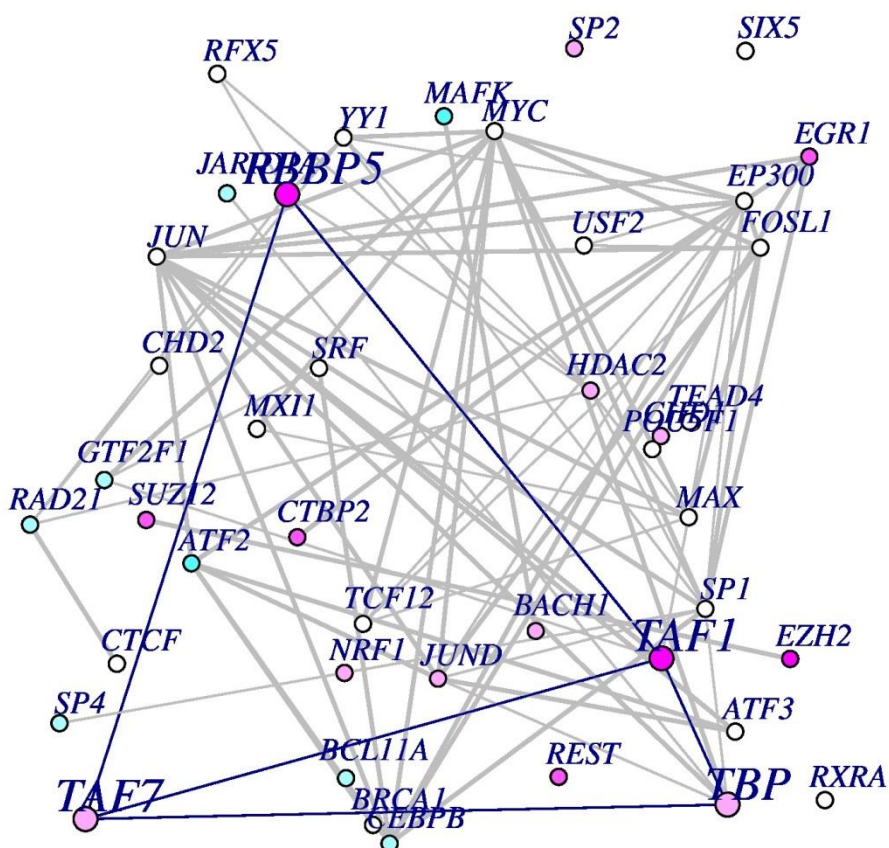

**Fig.S8:** Mapping of the association of ENCODE transcription factor binding sites (TFBS) with the statistics of age-DMRs, onto a protein interaction subnetwork constructed from the profiled transcription factors. Colors indicate the directionality and strength of the association between a TFBS profile and the corresponding t-statistics of age-associated differential DNA methylation of regions containing this TFBS. t-statistics and P-values were estimated from a multivariate linear regression including all TFs. Color codes: magenta (positive t-statistics and

$P < 0.001$ ), cyan (negative t-statistics and  $P < 0.001$ ), white (“not significant” i.e  $P > 0.001$ ). Thus, magenta-colored nodes indicate TFs, whose binding sites are more frequent in age-hyperM DMRs, whereas cyan-colored nodes indicate TFs, whose binding sites are more frequent in age-hypoM DMRs, as assessed from a multivariate model, which takes into account co-binding of transcription factors.

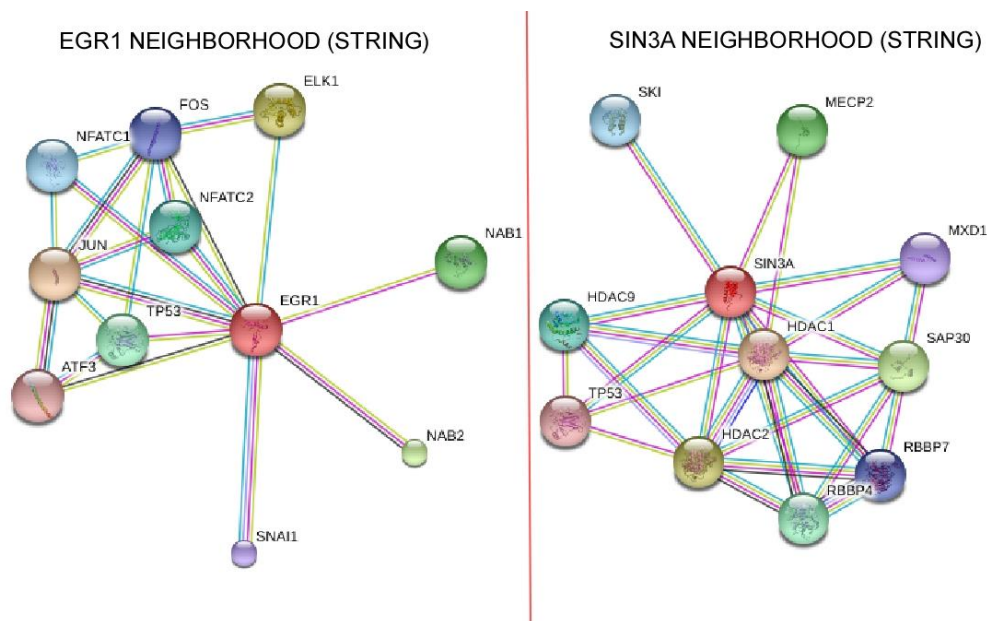

**Fig.S9:** Protein interaction neighborhoods of EGR1 and SIN3A, two transcription factors with binding sites enriched among age-hyperM DMRs, as derived from the STRING database.

## SUPPLEMENTARY TABLES

| CHR | Start    | End      | Dir. | FWER | Obs(AgeCGI) | Exp(AgeCGI) | P        |
|-----|----------|----------|------|------|-------------|-------------|----------|
| 6   | 28875360 | 32609783 | -1   | 0    | 33          | 31.4        | 0.324    |
| 11  | 55028287 | 58612833 | -1   | 0    | 10          | 10.76       | 0.527    |
| 11  | 1542355  | 2566193  | -1   | 0    | 16          | 17.73       | 0.629    |
| 16  | 62700011 | 67581437 | -1   | 0    | 36          | 28.2        | 0.034    |
| 12  | 54582926 | 57499258 | -1   | 0    | 12          | 20.06       | 0.981    |
| 19  | 53342580 | 55314814 | -1   | 0    | 38          | 24.42       | 6.00E-04 |
| 6   | 32757870 | 33914814 | -1   | 0    | 13          | 13.37       | 0.475    |
| 12  | 47665230 | 50720139 | -1   | 0    | 30          | 31.11       | 0.546    |
| 3   | 1.24E+08 | 1.27E+08 | -1   | 0    | 16          | 17.73       | 0.629    |
| 1   | 1.58E+08 | 1.61E+08 | -1   | 0    | 3           | 6.11        | NA       |
| 5   | 1.49E+08 | 1.51E+08 | -1   | 0    | 8           | 9.59        | 0.654    |
| 13  | 53216641 | 55818935 | -1   | 0    | 7           | 4.36        | 0.042    |
| 17  | 36553434 | 38545021 | -1   | 0    | 34          | 30.53       | 0.195    |



|    |          |          |    |   |    |       |          |
|----|----------|----------|----|---|----|-------|----------|
| 17 | 31437649 | 34450758 | -1 | 0 | 15 | 13.08 | 0.211    |
| 6  | 53493997 | 56792931 | -1 | 0 | 8  | 4.65  | 0.021    |
| 11 | 46998965 | 48510647 | -1 | 0 | 7  | 9.59  | 0.786    |
| 12 | 1.08E+08 | 1.1E+08  | -1 | 0 | 9  | 8.72  | 0.368    |
| 7  | 1.42E+08 | 1.44E+08 | -1 | 0 | 8  | 5.23  | 0.05     |
| 10 | 1.11E+08 | 1.12E+08 | -1 | 0 | 2  | 6.4   | NA       |
| 17 | 42741423 | 44648385 | -1 | 0 | 20 | 23.84 | 0.79     |
| 13 | 1.05E+08 | 1.09E+08 | -1 | 0 | 10 | 4.65  | 0.001    |
| 1  | 32566833 | 35206233 | -1 | 0 | 20 | 17.73 | 0.216    |
| 15 | 89987792 | 92307847 | -1 | 0 | 15 | 18.61 | 0.802    |
| 14 | 69134577 | 70369903 | -1 | 0 | 14 | 10.47 | 0.073    |
| 8  | 36347870 | 38068205 | -1 | 0 | 12 | 9.01  | 0.087    |
| 5  | 1.58E+08 | 1.6E+08  | -1 | 0 | 13 | 7.56  | 0.007    |
| 14 | 1.06E+08 | 1.07E+08 | -1 | 0 | 7  | 16.28 | 0.997    |
| 15 | 67786689 | 69318746 | -1 | 0 | 16 | 13.37 | 0.155    |
| 2  | 1.73E+08 | 1.74E+08 | -1 | 0 | 16 | 9.01  | 0.002    |
| 16 | 57080116 | 57924256 | -1 | 0 | 4  | 5.81  | NA       |
| 2  | 2.22E+08 | 2.24E+08 | -1 | 0 | 12 | 6.69  | 0.005    |
| 2  | 1.37E+08 | 1.39E+08 | -1 | 0 | 2  | 0.58  | NA       |
| 5  | 32461615 | 34053399 | -1 | 0 | 3  | 4.36  | NA       |
| 11 | 59659903 | 60710273 | -1 | 0 | 0  | 3.49  | NA       |
| 17 | 72244448 | 72957135 | -1 | 0 | 7  | 10.47 | 0.863    |
| 2  | 55237421 | 56318526 | -1 | 0 | 2  | 3.2   | NA       |
| 8  | 15215850 | 16998640 | -1 | 0 | 4  | 1.16  | NA       |
| 6  | 15256907 | 15512656 | -1 | 0 | 0  | 0.58  | NA       |
| 4  | 26024198 | 26609417 | -1 | 0 | 3  | 1.45  | NA       |
| 6  | 1.33E+08 | 1.34E+08 | -1 | 0 | 3  | 1.16  | NA       |
| 3  | 1.59E+08 | 1.6E+08  | -1 | 0 | 5  | 3.2   | 0.068    |
| 22 | 23467005 | 25343683 | -1 | 0 | 10 | 13.66 | 0.846    |
| 2  | 2.08E+08 | 2.08E+08 | -1 | 0 | 0  | 0.87  | NA       |
| 10 | 73936754 | 74804603 | -1 | 0 | 0  | 3.2   | NA       |
| 11 | 25623877 | 27303972 | -1 | 0 | 1  | 0.29  | NA       |
| 6  | 6811759  | 7641144  | -1 | 0 | 3  | 6.11  | NA       |
| 8  | 68334606 | 70372625 | -1 | 0 | 3  | 0.87  | NA       |
| 3  | 1.16E+08 | 1.18E+08 | -1 | 0 | 1  | 0.29  | NA       |
| 20 | 29844546 | 30804997 | -1 | 0 | 9  | 10.18 | 0.589    |
| 12 | 88178303 | 89413433 | -1 | 0 | 3  | 1.16  | NA       |
| 10 | 54203646 | 55750813 | -1 | 0 | 0  | 0.29  | NA       |
| 2  | 16790217 | 16955374 | -1 | 0 | 0  | 0     | NA       |
| 5  | 90369235 | 90635839 | -1 | 0 | 0  | 0.29  | NA       |
| 4  | 1.15E+08 | 1.16E+08 | -1 | 0 | 5  | 1.74  | 6.00E-04 |
| 5  | 10233474 | 10663596 | -1 | 0 | 4  | 4.07  | NA       |
| 3  | 75411042 | 77214150 | -1 | 0 | 9  | 5.81  | 0.039    |
| 9  | 35510933 | 36843876 | -1 | 0 | 4  | 10.47 | NA       |

|    |          |          |    |       |    |       |          |
|----|----------|----------|----|-------|----|-------|----------|
| 1  | 1.08E+08 | 1.09E+08 | -1 | 0     | 2  | 2.62  | NA       |
| 4  | 1.1E+08  | 1.1E+08  | -1 | 0     | 2  | 0.58  | NA       |
| 14 | 22951241 | 23286074 | 1  | 0     | 1  | 1.16  | NA       |
| 8  | 96694077 | 97549759 | -1 | 0     | 8  | 3.78  | 0.003    |
| 11 | 91450356 | 92670490 | -1 | 0     | 5  | 2.91  | 0.041    |
| 4  | 62076499 | 63075650 | -1 | 0     | 0  | 0.29  | NA       |
| 13 | 80930627 | 82651186 | -1 | 0     | 0  | 0.29  | NA       |
| 13 | 37441585 | 38518217 | -1 | 0     | 3  | 1.74  | NA       |
| 7  | 93105319 | 93641451 | -1 | 0     | 2  | 0.87  | NA       |
| 5  | 75810564 | 76029522 | -1 | 0     | 1  | 0.58  | NA       |
| 14 | 99502466 | 99861110 | 1  | 0     | 5  | 4.65  | 0.31     |
| 4  | 69381368 | 70155747 | -1 | 0     | 0  | 0     | NA       |
| 10 | 42398529 | 43216927 | -1 | 0     | 6  | 4.94  | 0.2      |
| 14 | 83560039 | 83784904 | -1 | 0     | 0  | 0     | NA       |
| 6  | 98934664 | 99667847 | -1 | 0     | 8  | 4.07  | 0.007    |
| 7  | 1.24E+08 | 1.25E+08 | -1 | 0     | 1  | 1.45  | NA       |
| 8  | 3706763  | 5028854  | -1 | 0     | 5  | 2.33  | 0.01     |
| 20 | 4680569  | 5731018  | -1 | 0     | 4  | 3.49  | NA       |
| 4  | 1.74E+08 | 1.74E+08 | -1 | 0     | 0  | 0     | NA       |
| 8  | 73391833 | 73848687 | -1 | 0     | 3  | 0.87  | NA       |
| 2  | 91962235 | 92318652 | -1 | 0     | 4  | 2.91  | NA       |
| 8  | 33937768 | 35252359 | -1 | 0     | 3  | 0.87  | NA       |
| 6  | 1.02E+08 | 1.04E+08 | -1 | 0     | 0  | 0     | NA       |
| 4  | 1.75E+08 | 1.76E+08 | -1 | 0     | 2  | 0.58  | NA       |
| 9  | 71669714 | 71999962 | -1 | 0     | 0  | 2.33  | NA       |
| 21 | 30451483 | 30713266 | -1 | 0     | 0  | 0.29  | NA       |
| 11 | 49802549 | 50371681 | -1 | 0     | 4  | 2.62  | NA       |
| 4  | 92879355 | 93646144 | -1 | 0     | 1  | 0.58  | NA       |
| 12 | 21283725 | 21670234 | -1 | 0     | 0  | 0.58  | NA       |
| 11 | 99975877 | 1E+08    | -1 | 0     | 0  | 0     | NA       |
| 3  | 63955727 | 67291183 | -1 | 0.002 | 8  | 5.52  | 0.07     |
| 4  | 1.88E+08 | 1.91E+08 | -1 | 0.002 | 12 | 13.66 | 0.638    |
| 12 | 1.14E+08 | 1.16E+08 | -1 | 0.002 | 38 | 14.83 | 3.00E-12 |
| 9  | 1.27E+08 | 1.29E+08 | -1 | 0.002 | 17 | 22.97 | 0.915    |
| 11 | 1.23E+08 | 1.23E+08 | -1 | 0.002 | 6  | 4.07  | 0.081    |
| 13 | 77399130 | 79360870 | -1 | 0.002 | 11 | 6.98  | 0.025    |
| 14 | 57127077 | 58702245 | -1 | 0.002 | 12 | 5.23  | 2.00E-04 |
| 6  | 71394664 | 72396934 | -1 | 0.002 | 7  | 2.91  | 0.001    |
| 2  | 50055492 | 51259931 | -1 | 0.002 | 2  | 1.16  | NA       |
| 13 | 51326803 | 51844375 | -1 | 0.002 | 2  | 1.45  | NA       |
| 4  | 93930622 | 95380105 | -1 | 0.002 | 3  | 1.45  | NA       |
| 12 | 93328735 | 93820263 | -1 | 0.002 | 0  | 0.58  | NA       |
| 4  | 1.11E+08 | 1.13E+08 | -1 | 0.002 | 11 | 6.4   | 0.011    |
| 8  | 89218697 | 89777219 | -1 | 0.002 | 1  | 0.29  | NA       |

|    |          |          |    |       |    |       |          |
|----|----------|----------|----|-------|----|-------|----------|
| 3  | 78860887 | 79416702 | -1 | 0.002 | 2  | 0.58  | NA       |
| 4  | 1.63E+08 | 1.64E+08 | -1 | 0.002 | 4  | 1.45  | NA       |
| 11 | 1.02E+08 | 1.02E+08 | -1 | 0.002 | 1  | 0.87  | NA       |
| 9  | 78253033 | 79306054 | -1 | 0.002 | 1  | 2.91  | NA       |
| 4  | 1.74E+08 | 1.75E+08 | -1 | 0.002 | 10 | 5.52  | 0.008    |
| 12 | 97924358 | 98178057 | -1 | 0.002 | 0  | 0     | NA       |
| 3  | 81540527 | 81913557 | -1 | 0.002 | 0  | 0.29  | NA       |
| 22 | 44963721 | 45277475 | -1 | 0.002 | 1  | 2.62  | NA       |
| 6  | 98117205 | 98565945 | -1 | 0.002 | 0  | 0     | NA       |
| 8  | 63662874 | 63921966 | -1 | 0.002 | 0  | 0     | NA       |
| 8  | 82510379 | 82784211 | -1 | 0.002 | 1  | 1.45  | NA       |
| 14 | 47513774 | 48095881 | -1 | 0.002 | 0  | 0     | NA       |
| 8  | 66617288 | 66743912 | 1  | 0.002 | 0  | 0     | NA       |
| 20 | 54942094 | 55034071 | -1 | 0.002 | 0  | 0.58  | NA       |
| 1  | 6094104  | 8492032  | -1 | 0.004 | 32 | 29.07 | 0.223    |
| 8  | 773837   | 3429430  | -1 | 0.004 | 9  | 35.47 | 1        |
| 6  | 1.64E+08 | 1.67E+08 | -1 | 0.004 | 21 | 12.79 | 0.003    |
| 15 | 72495878 | 75047357 | -1 | 0.004 | 18 | 17.15 | 0.344    |
| 1  | 20716191 | 22463884 | -1 | 0.004 | 17 | 15.99 | 0.321    |
| 14 | 19745841 | 21624958 | -1 | 0.004 | 6  | 9.89  | 0.903    |
| 1  | 1.52E+08 | 1.53E+08 | -1 | 0.004 | 1  | 0.58  | NA       |
| 4  | 9352827  | 12252318 | -1 | 0.004 | 10 | 6.98  | 0.061    |
| 2  | 1.32E+08 | 1.34E+08 | -1 | 0.004 | 20 | 13.66 | 0.017    |
| 8  | 1.26E+08 | 1.28E+08 | -1 | 0.004 | 0  | 1.16  | NA       |
| 11 | 20390803 | 25070714 | -1 | 0.004 | 9  | 5.52  | 0.026    |
| 20 | 43343655 | 45313224 | -1 | 0.004 | 32 | 22.97 | 0.011    |
| 11 | 1.18E+08 | 1.19E+08 | -1 | 0.004 | 14 | 13.96 | 0.423    |
| 21 | 35468700 | 36097651 | -1 | 0.004 | 4  | 2.62  | NA       |
| 8  | 48038289 | 48437852 | -1 | 0.004 | 2  | 1.45  | NA       |
| 1  | 60956045 | 61479999 | -1 | 0.004 | 0  | 0     | NA       |
| 6  | 96497737 | 97457431 | -1 | 0.004 | 1  | 1.16  | NA       |
| 6  | 91600978 | 92721782 | -1 | 0.004 | 0  | 0     | NA       |
| 2  | 1.46E+08 | 1.47E+08 | -1 | 0.004 | 0  | 0     | NA       |
| 7  | 54142863 | 54949472 | -1 | 0.004 | 5  | 2.33  | 0.01     |
| 5  | 6828054  | 7686199  | -1 | 0.004 | 5  | 1.45  | NA       |
| 8  | 50837079 | 51576109 | -1 | 0.004 | 0  | 0     | NA       |
| 2  | 2.12E+08 | 2.13E+08 | -1 | 0.004 | 0  | 0     | NA       |
| 8  | 75860623 | 76227159 | -1 | 0.004 | 1  | 0.29  | NA       |
| 17 | 10419499 | 14427896 | -1 | 0.006 | 13 | 10.18 | 0.11     |
| 5  | 16392700 | 18972260 | -1 | 0.006 | 10 | 4.07  | 2.00E-04 |
| 3  | 54815664 | 55824354 | -1 | 0.006 | 9  | 3.2   | 3.00E-05 |
| 19 | 41271256 | 42470790 | -1 | 0.006 | 9  | 13.96 | 0.926    |
| 3  | 1.08E+08 | 1.1E+08  | -1 | 0.006 | 0  | 0.58  | NA       |
| 4  | 1.29E+08 | 1.3E+08  | -1 | 0.006 | 6  | 3.2   | 0.018    |

|    |          |          |    |       |    |       |          |
|----|----------|----------|----|-------|----|-------|----------|
| 3  | 1.19E+08 | 1.2E+08  | -1 | 0.006 | 5  | 4.07  | 0.197    |
| 8  | 61119660 | 62066624 | -1 | 0.006 | 5  | 4.36  | 0.252    |
| 8  | 1.03E+08 | 1.04E+08 | -1 | 0.006 | 0  | 2.62  | NA       |
| 19 | 17386421 | 18415747 | -1 | 0.006 | 18 | 33.73 | 0.999    |
| 4  | 1.6E+08  | 1.61E+08 | -1 | 0.006 | 0  | 0     | NA       |
| 9  | 72978571 | 73103756 | -1 | 0.006 | 1  | 1.74  | NA       |
| 20 | 47862976 | 48178928 | -1 | 0.006 | 1  | 1.74  | NA       |
| 9  | 19424228 | 19657248 | -1 | 0.006 | 0  | 0     | NA       |
| 6  | 69717664 | 69990372 | -1 | 0.006 | 0  | 0     | NA       |
| 18 | 21451585 | 21741492 | 1  | 0.006 | 1  | 0.87  | NA       |
| 6  | 36817048 | 41176577 | -1 | 0.008 | 14 | 15.41 | 0.601    |
| 16 | 78585546 | 83992394 | -1 | 0.008 | 10 | 9.59  | 0.356    |
| 16 | 84581885 | 85654314 | -1 | 0.008 | 8  | 12.5  | 0.914    |
| 7  | 1.36E+08 | 1.38E+08 | -1 | 0.008 | 6  | 4.07  | 0.081    |
| 9  | 1.37E+08 | 1.38E+08 | -1 | 0.008 | 2  | 7.85  | NA       |
| 11 | 1.31E+08 | 1.32E+08 | -1 | 0.008 | 2  | 1.45  | NA       |
| 2  | 1.22E+08 | 1.24E+08 | -1 | 0.008 | 3  | 3.2   | NA       |
| 1  | 1.47E+08 | 1.49E+08 | -1 | 0.008 | 6  | 9.59  | 0.885    |
| 2  | 1.71E+08 | 1.72E+08 | -1 | 0.008 | 10 | 7.85  | 0.132    |
| 16 | 47882395 | 48720568 | -1 | 0.008 | 0  | 1.74  | NA       |
| 10 | 33562205 | 34527486 | -1 | 0.008 | 1  | 1.45  | NA       |
| 8  | 54687817 | 56602315 | -1 | 0.008 | 20 | 7.85  | 2.00E-07 |
| 2  | 1.64E+08 | 1.66E+08 | -1 | 0.008 | 6  | 2.04  | 2.00E-04 |
| 19 | 14333799 | 15271010 | -1 | 0.008 | 9  | 9.89  | 0.547    |
| 8  | 78923501 | 80789586 | -1 | 0.008 | 6  | 3.2   | 0.018    |
| 2  | 1.7E+08  | 1.7E+08  | -1 | 0.008 | 0  | 1.16  | NA       |
| 5  | 97645526 | 97949352 | -1 | 0.008 | 0  | 0     | NA       |
| 14 | 84245709 | 85292067 | -1 | 0.008 | 0  | 0     | NA       |
| 2  | 76672386 | 76975220 | -1 | 0.008 | 0  | 0     | NA       |
| 8  | 64518293 | 65152945 | -1 | 0.008 | 0  | 0     | NA       |
| 10 | 79937018 | 81034374 | -1 | 0.01  | 4  | 3.2   | NA       |
| 17 | 39977959 | 41782011 | -1 | 0.01  | 17 | 26.17 | 0.981    |
| 5  | 14244130 | 16082260 | -1 | 0.01  | 4  | 3.49  | NA       |
| 8  | 92647788 | 94937996 | -1 | 0.01  | 7  | 3.49  | 0.008    |
| 3  | 57080664 | 58836467 | -1 | 0.01  | 3  | 8.14  | NA       |
| 11 | 43983977 | 45179364 | -1 | 0.01  | 8  | 5.81  | 0.096    |
| 5  | 1.73E+08 | 1.74E+08 | -1 | 0.01  | 3  | 2.62  | NA       |
| 17 | 48382610 | 50188449 | -1 | 0.01  | 6  | 10.76 | 0.944    |
| 16 | 24931370 | 27476265 | -1 | 0.01  | 4  | 4.65  | NA       |
| 19 | 51529858 | 52328110 | -1 | 0.01  | 9  | 9.01  | 0.413    |
| 12 | 12753718 | 13748224 | -1 | 0.01  | 4  | 6.4   | NA       |
| 2  | 42442880 | 43372366 | -1 | 0.01  | 5  | 3.49  | 0.104    |
| 9  | 1.36E+08 | 1.36E+08 | -1 | 0.01  | 7  | 12.5  | 0.959    |
| 2  | 3704839  | 5749552  | -1 | 0.01  | 2  | 1.45  | NA       |

|    |          |          |    |       |    |       |          |
|----|----------|----------|----|-------|----|-------|----------|
| 5  | 41968425 | 44048305 | -1 | 0.01  | 6  | 8.72  | 0.813    |
| 11 | 89535662 | 90155977 | -1 | 0.01  | 1  | 1.16  | NA       |
| 5  | 1.19E+08 | 1.19E+08 | -1 | 0.01  | 0  | 0.29  | NA       |
| 11 | 6401965  | 8264034  | -1 | 0.012 | 13 | 9.3   | 0.055    |
| 1  | 1.74E+08 | 1.77E+08 | -1 | 0.012 | 7  | 4.65  | 0.063    |
| 5  | 1.41E+08 | 1.42E+08 | -1 | 0.012 | 8  | 8.43  | 0.477    |
| 10 | 75351076 | 76866367 | -1 | 0.012 | 5  | 7.85  | 0.84     |
| 6  | 1.56E+08 | 1.57E+08 | -1 | 0.012 | 2  | 1.74  | NA       |
| 1  | 81510925 | 82951578 | -1 | 0.012 | 3  | 0.87  | NA       |
| 21 | 31538828 | 32255212 | -1 | 0.012 | 0  | 0     | NA       |
| 15 | 87204431 | 88843899 | -1 | 0.012 | 1  | 0.87  | NA       |
| 18 | 43842240 | 44644942 | -1 | 0.012 | 5  | 4.36  | 0.252    |
| 3  | 5325634  | 5625835  | -1 | 0.012 | 0  | 0     | NA       |
| 7  | 37123550 | 40819169 | -1 | 0.014 | 9  | 6.69  | 0.101    |
| 8  | 11832525 | 14710963 | -1 | 0.014 | 8  | 6.11  | 0.126    |
| 11 | 15099930 | 17278779 | -1 | 0.014 | 7  | 6.11  | 0.246    |
| 6  | 26510580 | 27706264 | 1  | 0.014 | 12 | 10.18 | 0.192    |
| 8  | 29019587 | 30210405 | -1 | 0.014 | 0  | 3.49  | NA       |
| 5  | 70670374 | 71687192 | -1 | 0.014 | 4  | 2.04  | NA       |
| 20 | 30994076 | 32156436 | -1 | 0.014 | 3  | 6.69  | NA       |
| 7  | 75513140 | 76054527 | -1 | 0.014 | 7  | 6.69  | 0.345    |
| 12 | 89586880 | 90908677 | -1 | 0.014 | 4  | 2.91  | NA       |
| 2  | 1.45E+08 | 1.45E+08 | -1 | 0.014 | 1  | 1.45  | NA       |
| 1  | 13448242 | 14113201 | -1 | 0.014 | 4  | 2.91  | NA       |
| 4  | 1.54E+08 | 1.54E+08 | -1 | 0.014 | 0  | 1.45  | NA       |
| 5  | 11791728 | 12883715 | -1 | 0.014 | 3  | 1.16  | NA       |
| 2  | 1.18E+08 | 1.19E+08 | -1 | 0.014 | 1  | 1.45  | NA       |
| 13 | 61090581 | 61932410 | -1 | 0.014 | 0  | 0     | NA       |
| 22 | 17955362 | 18217141 | -1 | 0.014 | 1  | 0.87  | NA       |
| 1  | 2.08E+08 | 2.1E+08  | -1 | 0.016 | 4  | 4.65  | NA       |
| 3  | 1.77E+08 | 1.79E+08 | -1 | 0.016 | 0  | 0.29  | NA       |
| 1  | 2.15E+08 | 2.17E+08 | -1 | 0.016 | 4  | 1.16  | NA       |
| 17 | 2699556  | 3343601  | -1 | 0.016 | 1  | 1.45  | NA       |
| 12 | 96177524 | 97346526 | -1 | 0.016 | 3  | 4.94  | NA       |
| 16 | 58121049 | 59656293 | -1 | 0.016 | 6  | 4.65  | 0.154    |
| 12 | 32287236 | 33205701 | -1 | 0.016 | 2  | 1.74  | NA       |
| 16 | 70955223 | 71446866 | -1 | 0.016 | 2  | 0.87  | NA       |
| 5  | 91213312 | 91715141 | -1 | 0.016 | 0  | 0     | NA       |
| 3  | 71866097 | 74761390 | -1 | 0.018 | 7  | 4.36  | 0.042    |
| 2  | 2.17E+08 | 2.19E+08 | -1 | 0.018 | 1  | 1.45  | NA       |
| 3  | 10137658 | 11617586 | -1 | 0.018 | 6  | 6.11  | 0.412    |
| 1  | 1.63E+08 | 1.65E+08 | -1 | 0.018 | 9  | 2.91  | 4.00E-06 |
| 5  | 1.38E+08 | 1.4E+08  | -1 | 0.018 | 12 | 16.86 | 0.899    |
| 4  | 86594376 | 87945786 | -1 | 0.018 | 2  | 1.74  | NA       |

|    |          |          |    |       |    |       |       |
|----|----------|----------|----|-------|----|-------|-------|
| 2  | 20638399 | 22114272 | -1 | 0.018 | 3  | 2.91  | NA    |
| 14 | 24845722 | 27429693 | -1 | 0.018 | 3  | 2.33  | NA    |
| 2  | 1.62E+08 | 1.62E+08 | -1 | 0.018 | 0  | 0.29  | NA    |
| 20 | 58295012 | 58983807 | -1 | 0.018 | 2  | 2.33  | NA    |
| 1  | 2.03E+08 | 2.03E+08 | -1 | 0.02  | 6  | 6.11  | 0.412 |
| 17 | 6327601  | 7360681  | -1 | 0.02  | 15 | 20.93 | 0.924 |
| 7  | 1.34E+08 | 1.35E+08 | -1 | 0.02  | 0  | 0.58  | NA    |
| 7  | 1.06E+08 | 1.06E+08 | -1 | 0.02  | 1  | 2.04  | NA    |
| 13 | 34919279 | 35735300 | -1 | 0.02  | 0  | 0     | NA    |
| 5  | 87018149 | 87880065 | -1 | 0.02  | 2  | 0.58  | NA    |
| 19 | 22953960 | 22953960 | -1 | 0.02  | 0  | 0     | NA    |
| 12 | 1.12E+08 | 1.13E+08 | -1 | 0.022 | 3  | 6.11  | NA    |
| 2  | 14163676 | 16035877 | -1 | 0.022 | 4  | 1.74  | NA    |
| 7  | 70746877 | 72040216 | -1 | 0.022 | 4  | 1.16  | NA    |
| 3  | 12655573 | 13213415 | -1 | 0.022 | 1  | 4.94  | NA    |
| 19 | 6730061  | 7007910  | -1 | 0.022 | 0  | 2.62  | NA    |
| 3  | 20887296 | 21447688 | -1 | 0.022 | 0  | 0     | NA    |
| 1  | 1.5E+08  | 1.51E+08 | -1 | 0.024 | 8  | 14.83 | 0.979 |
| 2  | 2.19E+08 | 2.19E+08 | -1 | 0.024 | 4  | 4.36  | NA    |
| 1  | 1.45E+08 | 1.46E+08 | -1 | 0.024 | 6  | 6.11  | 0.412 |
| 3  | 45942460 | 46547809 | -1 | 0.024 | 0  | 0.87  | NA    |
| 8  | 1.38E+08 | 1.41E+08 | -1 | 0.024 | 2  | 0.87  | NA    |
| 3  | 1.85E+08 | 1.86E+08 | -1 | 0.024 | 5  | 3.49  | 0.104 |
| 15 | 33278159 | 34531380 | -1 | 0.024 | 1  | 2.33  | NA    |
| 8  | 98774467 | 99422528 | -1 | 0.024 | 5  | 2.91  | 0.041 |
| 3  | 1.57E+08 | 1.57E+08 | -1 | 0.024 | 2  | 1.74  | NA    |
| 2  | 1.12E+08 | 1.13E+08 | -1 | 0.024 | 0  | 0     | NA    |
| 1  | 8908794  | 9635799  | -1 | 0.026 | 7  | 5.52  | 0.159 |
| 14 | 77079351 | 78389529 | -1 | 0.026 | 11 | 10.76 | 0.385 |
| 8  | 18411478 | 19719149 | -1 | 0.026 | 5  | 3.2   | 0.068 |
| 15 | 92849000 | 93790914 | -1 | 0.026 | 5  | 5.52  | 0.49  |
| 8  | 39695883 | 40958085 | -1 | 0.026 | 1  | 0.29  | NA    |
| 17 | 61600386 | 62401764 | -1 | 0.026 | 5  | 6.98  | 0.74  |
| 7  | 45847100 | 46754068 | -1 | 0.026 | 3  | 0.87  | NA    |
| 12 | 1.19E+08 | 1.2E+08  | -1 | 0.026 | 6  | 2.91  | 0.009 |
| 6  | 23002396 | 23523214 | -1 | 0.026 | 0  | 0     | NA    |
| 4  | 1.31E+08 | 1.31E+08 | -1 | 0.026 | 0  | 0     | NA    |
| 12 | 61806201 | 62108676 | -1 | 0.026 | 0  | 0     | NA    |
| 10 | 38119027 | 38499434 | -1 | 0.026 | 0  | 1.16  | NA    |
| 9  | 87023997 | 87636383 | -1 | 0.026 | 2  | 1.45  | NA    |
| 8  | 6607096  | 7754234  | -1 | 0.028 | 5  | 3.2   | 0.068 |
| 8  | 1.34E+08 | 1.35E+08 | -1 | 0.028 | 3  | 2.04  | NA    |
| 10 | 86863762 | 89130195 | -1 | 0.028 | 7  | 12.21 | 0.951 |
| 2  | 11863086 | 13879237 | -1 | 0.028 | 3  | 1.74  | NA    |

|    |          |          |    |       |    |       |          |
|----|----------|----------|----|-------|----|-------|----------|
| 7  | 26341566 | 27565815 | -1 | 0.028 | 25 | 18.32 | 0.026    |
| 2  | 1.51E+08 | 1.51E+08 | -1 | 0.028 | 2  | 0.87  | NA       |
| 12 | 3353356  | 4598353  | -1 | 0.03  | 10 | 7.56  | 0.104    |
| 19 | 42734510 | 44218746 | -1 | 0.03  | 7  | 14.83 | 0.991    |
| 12 | 99124116 | 1.01E+08 | -1 | 0.03  | 2  | 2.04  | NA       |
| 1  | 1.61E+08 | 1.61E+08 | -1 | 0.03  | 3  | 4.94  | NA       |
| 1  | 57514244 | 58472821 | -1 | 0.03  | 3  | 0.87  | NA       |
| 2  | 27264194 | 27505515 | -1 | 0.03  | 6  | 6.11  | 0.412    |
| 3  | 56157811 | 56896467 | -1 | 0.03  | 4  | 2.04  | NA       |
| 9  | 98995607 | 99895750 | -1 | 0.03  | 4  | 9.3   | NA       |
| 9  | 80073082 | 80335274 | -1 | 0.03  | 0  | 0.58  | NA       |
| 6  | 58141967 | 58263157 | 1  | 0.03  | 1  | 0.29  | NA       |
| 12 | 5127222  | 6691820  | -1 | 0.032 | 8  | 9.01  | 0.57     |
| 2  | 2.4E+08  | 2.42E+08 | -1 | 0.032 | 10 | 18.61 | 0.99     |
| 7  | 99440199 | 1E+08    | -1 | 0.032 | 4  | 6.69  | NA       |
| 11 | 72581673 | 73428020 | -1 | 0.032 | 3  | 5.23  | NA       |
| 19 | 38899811 | 40276380 | -1 | 0.032 | 19 | 25    | 0.907    |
| 10 | 18133438 | 19778008 | -1 | 0.032 | 2  | 1.45  | NA       |
| 5  | 27036352 | 27120949 | -1 | 0.032 | 0  | 0     | NA       |
| 14 | 46791389 | 47311141 | -1 | 0.032 | 0  | 0.29  | NA       |
| 19 | 22141063 | 22149119 | -1 | 0.032 | 0  | 0     | NA       |
| 1  | 2205600  | 3289902  | -1 | 0.034 | 14 | 31.11 | 1        |
| 11 | 12065669 | 13205282 | -1 | 0.034 | 6  | 3.2   | 0.018    |
| 11 | 1.12E+08 | 1.13E+08 | -1 | 0.034 | 2  | 5.52  | NA       |
| 14 | 21820190 | 22939357 | -1 | 0.034 | 1  | 1.45  | NA       |
| 7  | 1E+08    | 1.01E+08 | -1 | 0.034 | 17 | 9.01  | 7.00E-04 |
| 10 | 1.28E+08 | 1.28E+08 | -1 | 0.034 | 2  | 0.87  | NA       |
| 12 | 1.04E+08 | 1.05E+08 | -1 | 0.036 | 4  | 6.4   | NA       |
| 12 | 1.17E+08 | 1.17E+08 | -1 | 0.036 | 3  | 3.2   | NA       |
| 5  | 39665664 | 41587899 | -1 | 0.036 | 2  | 3.2   | NA       |
| 4  | 70860724 | 71587748 | -1 | 0.036 | 3  | 1.16  | NA       |
| 9  | 33623433 | 35042369 | -1 | 0.036 | 9  | 14.54 | 0.946    |
| 13 | 58655819 | 60055857 | -1 | 0.036 | 0  | 0     | NA       |
| 8  | 58788163 | 59366127 | -1 | 0.036 | 2  | 1.74  | NA       |
| 2  | 2.25E+08 | 2.25E+08 | -1 | 0.036 | 0  | 0     | NA       |
| 8  | 65936215 | 66581126 | -1 | 0.036 | 0  | 0.58  | NA       |
| 1  | 15598865 | 16820353 | -1 | 0.038 | 8  | 13.66 | 0.956    |
| 11 | 1.25E+08 | 1.26E+08 | -1 | 0.038 | 4  | 4.07  | NA       |
| 1  | 2.37E+08 | 2.39E+08 | -1 | 0.038 | 2  | 1.16  | NA       |
| 3  | 1.36E+08 | 1.37E+08 | -1 | 0.038 | 2  | 1.45  | NA       |
| 11 | 28487617 | 29358540 | -1 | 0.038 | 0  | 0     | NA       |
| 4  | 1.56E+08 | 1.57E+08 | -1 | 0.038 | 3  | 1.45  | NA       |
| 8  | 1.19E+08 | 1.21E+08 | -1 | 0.04  | 6  | 2.04  | 2.00E-04 |
| 17 | 38907446 | 39306376 | -1 | 0.04  | 0  | 0.87  | NA       |

|    |          |          |    |       |    |       |       |
|----|----------|----------|----|-------|----|-------|-------|
| 7  | 77976102 | 78982418 | -1 | 0.04  | 0  | 0     | NA    |
| 5  | 79070077 | 79542470 | 1  | 0.04  | 2  | 0.87  | NA    |
| 4  | 1.6E+08  | 1.6E+08  | -1 | 0.04  | 1  | 1.74  | NA    |
| 5  | 1.35E+08 | 1.38E+08 | -1 | 0.042 | 10 | 9.01  | 0.272 |
| 11 | 1.14E+08 | 1.15E+08 | -1 | 0.042 | 2  | 2.62  | NA    |
| 3  | 37332133 | 38529102 | -1 | 0.042 | 5  | 6.69  | 0.698 |
| 16 | 68691561 | 69660388 | -1 | 0.042 | 4  | 5.81  | NA    |
| 1  | 91989267 | 92907368 | -1 | 0.042 | 1  | 2.91  | NA    |
| 5  | 91970207 | 92868380 | -1 | 0.042 | 0  | 0     | NA    |
| 2  | 1.68E+08 | 1.69E+08 | -1 | 0.042 | 3  | 0.87  | NA    |
| 8  | 70421379 | 70964123 | -1 | 0.042 | 3  | 1.45  | NA    |
| 8  | 87479250 | 87721838 | -1 | 0.042 | 0  | 0.87  | NA    |
| 15 | 62411575 | 63011250 | -1 | 0.044 | 3  | 2.62  | NA    |
| 3  | 1.56E+08 | 1.56E+08 | -1 | 0.044 | 1  | 1.74  | NA    |
| 13 | 98044144 | 98893091 | -1 | 0.044 | 3  | 3.78  | NA    |
| 3  | 1.5E+08  | 1.51E+08 | -1 | 0.044 | 4  | 3.49  | NA    |
| 10 | 24909511 | 25396009 | -1 | 0.044 | 2  | 2.04  | NA    |
| 1  | 2.12E+08 | 2.13E+08 | -1 | 0.046 | 4  | 6.98  | NA    |
| 12 | 1.21E+08 | 1.22E+08 | -1 | 0.046 | 3  | 6.11  | NA    |
| 10 | 43656166 | 44090827 | -1 | 0.046 | 5  | 5.23  | 0.431 |
| 6  | 99857406 | 99969075 | -1 | 0.046 | 0  | 0.58  | NA    |
| 14 | 39308020 | 39519326 | -1 | 0.046 | 0  | 0     | NA    |
| 16 | 33783802 | 33956592 | 1  | 0.046 | 4  | 2.62  | NA    |
| 1  | 44047427 | 46157389 | -1 | 0.048 | 18 | 18.32 | 0.472 |
| 10 | 99928067 | 1.02E+08 | -1 | 0.048 | 9  | 9.01  | 0.413 |
| 11 | 1.26E+08 | 1.28E+08 | -1 | 0.048 | 2  | 0.58  | NA    |
| 7  | 1.46E+08 | 1.48E+08 | -1 | 0.048 | 4  | 1.16  | NA    |
| 4  | 67950111 | 68586568 | -1 | 0.048 | 1  | 0.87  | NA    |
| 5  | 85577155 | 86205515 | -1 | 0.048 | 0  | 0     | NA    |
| 5  | 27387958 | 27532684 | -1 | 0.048 | 0  | 0     | NA    |

**Table S1:** Table lists the 351 significantly age-associated blocks (FWER<0.05). Columns label the chromosome, approximate start and end positions, (Dir) whether hyper (1) or hypomethylated (1), the Family-Wise Error Rate (FWER), the observed number of age-hypermethylated CGI DMRs contained within the age-associated block, the number expected by the null distribution, and the P-value of enrichment of age-hyperM CGIs within the age-associated block. Some FWERs are indicated as “0” whenever these were <0.001. In the case of the enrichment of age-hypermethylated CGIs, P-values were only estimated for blocks with at least 5 observed age-hypermethylated CGIs, hence the NAs.

| TF                              | OR(hypoM-hESC) | P(hypoM-hESC) | OR(hypoM-DIFF) | P(hypoM-DIFF) |
|---------------------------------|----------------|---------------|----------------|---------------|
| ATF2_SC.81188_None__HudsonAlpha | 2.24           | 4.00E-16      | 1.69           | 2.00E-14      |
| ATF3_None__HudsonAlpha          | 0.38           | 1             | 2.04           | 1.00E-19      |
| Bach1_sc.14700_None__Stanford   | 0.68           | 0.999         | 2              | 2.00E-35      |



|                                 |       |          |      |           |
|---------------------------------|-------|----------|------|-----------|
| BCL11A_None__HudsonAlpha        | 18.01 | 2.00E-51 | 0.43 | 0.989     |
| BRCA1_A300.000A_None__Stanford  | 0.24  | 1        | 1.54 | 7.00E-05  |
| CEBPB_None__Stanford            | 1.19  | 0.132    | 1.71 | 6.00E-11  |
| CHD1_A301.218A_None__Broad      | 0.81  | 0.975    | 0.95 | 0.77      |
| CHD1_A301.218A_None__Stanford   | 0.78  | 0.901    | 0.75 | 0.988     |
| CHD2_AB68301_None__Stanford     | 0.57  | 1        | 1.31 | 2.00E-05  |
| c.Jun_None__Stanford            | 2.85  | 1.00E-07 | 1.12 | 0.27      |
| c.Myc_None__Stanford            | 0.46  | 1        | 1.97 | 1.00E-20  |
| c.Myc_None__UT.A                | 0.79  | 0.731    | 1.44 | 0.125     |
| CtBP2_None__USC                 | 1.56  | 1.00E-06 | 0.98 | 0.648     |
| CTCF_None__Broad                | 1.02  | 0.402    | 3.84 | <1E-500   |
| CTCF_None__UT.A                 | 0.81  | 0.983    | 3.46 | 3.00E-196 |
| CTCF_SC.5916_None__HudsonAlpha  | 0.93  | 0.799    | 4.06 | 9.00E-288 |
| Egr.1_None__HudsonAlpha         | 0.6   | 1        | 1.28 | 7.00E-05  |
| EZH2_39875_None__Broad          | 0.4   | 1        | 0.72 | 1         |
| FOSL1_SC.183_None__HudsonAlpha  | 0.42  | 0.985    | 1.26 | 0.124     |
| GABP_None__HudsonAlpha          | 0.28  | 1        | 2.72 | 5.00E-62  |
| GTF2F1_AB28179_None__Stanford   | 0.54  | 1        | 1.34 | 2.00E-04  |
| HDAC2_SC.6296_None__HudsonAlph  |       |          |      |           |
| a                               | 3.09  | 1.00E-23 | 1.44 | 3.00E-05  |
| JARID1A_ab26049_None__Broad     | 0.04  | 1        | 1.27 | 0.028     |
| JunD_None__HudsonAlpha          | 1.28  | 0.022    | 1.23 | 0.004     |
| JunD_None__Stanford             | 1.79  | 6.00E-08 | 2.06 | 8.00E-28  |
| MafK_ab50322_None__Stanford     | 2.43  | 1.00E-08 | 1.54 | 1.00E-04  |
| Max_None__USC                   | 1.07  | 0.282    | 2.14 | 7.00E-45  |
| Mxi1_AF4185_None__Stanford      | 0.4   | 1        | 1.8  | 2.00E-21  |
| NANOG_SC.33759_None__HudsonAl   |       |          |      |           |
| pha                             | 8.71  | 1.00E-75 | 1.11 | 0.24      |
| Nrf1_None__Stanford             | 0.04  | 1        | 1.2  | 0.014     |
| NRSF_None__HudsonAlpha          | 0.44  | 1        | 2.05 | 5.00E-19  |
| p300_None__HudsonAlpha          | 2.75  | 4.00E-29 | 1.64 | 1.00E-13  |
| Pol2.4H8_None__HudsonAlpha      | 0.62  | 1        | 1.04 | 0.226     |
| Pol2_None__HudsonAlpha          | 0.52  | 1        | 1.24 | 6.00E-08  |
| Pol2_None__UT.A                 | 0.45  | 1        | 1.19 | 1.00E-04  |
| POU5F1_SC.9081_None__HudsonAlp  |       |          |      |           |
| ha                              | 15.94 | 2.00E-88 | 0.5  | 0.997     |
| Rad21_None__HudsonAlpha         | 1.18  | 0.013    | 4.17 | <1E-500   |
| Rad21_None__Stanford            | 1.04  | 0.33     | 4.59 | <1E-500   |
| RBBP5_A300.109A_None__Broad     | 0.6   | 1        | 1.23 | 1.00E-07  |
| RFX5_200.401.194_None__Stanford | 0.48  | 0.985    | 1.74 | 2.00E-04  |
| RXRA_None__HudsonAlpha          | 3.06  | 9.00E-06 | 1.69 | 0.005     |
| Sin3Ak.20_None__HudsonAlpha     | 0.46  | 1        | 1.53 | 3.00E-13  |
| SIN3A_NB600.1263_None__Stanford | 0.52  | 1        | 1.92 | 1.00E-77  |
| SIX5_None__HudsonAlpha          | 0.16  | 1        | 1.39 | 8.00E-04  |

|                                       |      |          |      |          |
|---------------------------------------|------|----------|------|----------|
| SP1_None__HudsonAlpha                 | 1.84 | 9.00E-15 | 1.25 | 3.00E-05 |
| SP2_SC.643_None__HudsonAlpha          | 0.21 | 1        | 1.49 | 3.00E-05 |
| SP4_V.20_None__HudsonAlpha            | 0.5  | 1        | 1.88 | 7.00E-30 |
| SRF_None__HudsonAlpha                 | 0.35 | 1        | 1.45 | 3.00E-04 |
| SUZ12_None__USC                       | 0.59 | 0.994    | 0.48 | 1        |
| TAF1_None__HudsonAlpha                | 0.52 | 1        | 1.28 | 1.00E-10 |
| TAF7_SC.101167_None__HudsonAlph<br>a  | 0.58 | 1        | 1.21 | 3.00E-04 |
| TBP_None__Stanford                    | 0.62 | 1        | 1.3  | 3.00E-10 |
| TCF12_None__HudsonAlpha               | 3.51 | 1.00E-31 | 1.93 | 1.00E-15 |
| TEAD4_SC.101184_None__HudsonAl<br>pha | 2.21 | 6.00E-18 | 1.7  | 3.00E-17 |
| USF.1_None__HudsonAlpha               | 0.84 | 0.947    | 1.76 | 8.00E-25 |
| USF2_None__Stanford                   | 0.63 | 0.998    | 1.64 | 2.00E-10 |
| YY1_SC.281_None__HudsonAlpha          | 1.19 | 0.025    | 1.92 | 3.00E-44 |
| Znf143_16618.1.AP_None__Stanford      | 0.77 | 0.998    | 4.1  | <1E-500  |

**Table S2:** Table lists the Odds Ratios (OR) and P-values of enrichment (Fisher-test) of transcription factor binding sites, as obtained in the H1-hESC line, for two different classes of DMRs: those hypomethylated in hESCs compared to somatic/differentiated tissue (hypoM-hESC) and those hypomethylated in differentiated tissue compared to hESCs (hypoM-DIFF).

| TF                                | OR(hypoM-hESC) | P(hypoM-hESC) | OR(hypoM-LIV) | P(hypoM-LIV) |
|-----------------------------------|----------------|---------------|---------------|--------------|
| ARID3A_NB100.279_None__Stanford   | 1.6            | 0.003         | 1.32          | 4.00E-05     |
| ATF3_None__HudsonAlpha            | 0.85           | 0.745         | 0.35          | 1            |
| BHLHE40_NB100.1800_None__Stanford | 0.9            | 0.76          | 0.69          | 1            |
| BHLHE40_None__HudsonAlpha         | 1.24           | 0.319         | 0.66          | 0.992        |
| BRCA1_A300.000A_None__Stanford    | 0.22           | 0.999         | 0.12          | 1            |
| CEBPB_forskolin__Stanford         | 1.27           | 0.11          | 1.34          | 3.00E-05     |
| CEBPB_None__Stanford              | 1.55           | 0.003         | 1.6           | 7.00E-15     |
| CEBPB_SC.150_None__HudsonAlpha    | 1.57           | 0.023         | 1.93          | 2.00E-16     |
| CEBPD_SC.636_None__HudsonAlpha    | 0.72           | 0.967         | 0.6           | 1            |
| CHD2_AB68301_None__Stanford       | 0.51           | 0.998         | 0.27          | 1            |
| c.Jun_None__Stanford              | 2.32           | 2.00E-04      | 0.95          | 0.683        |
| c.Myc_None__UT.A                  | 0.37           | 0.999         | 0.39          | 1            |
| COREST_sc.30189_None__Stanford    | 0.81           | 0.849         | 0.52          | 1            |
| CTCF_None__Broad                  | 1.6            | 1.00E-05      | 1.03          | 0.271        |
| CTCF_None__UT.A                   | 1.69           | 1.00E-04      | 0.94          | 0.852        |
| CTCF_None__UW                     | 1.56           | 6.00E-05      | 0.93          | 0.933        |
| CTCF_SC.5916_None__HudsonAlpha    | 1.59           | 3.00E-05      | 0.88          | 0.992        |
| ELF1_SC.631_None__HudsonAlpha     | 0.6            | 1             | 0.63          | 1            |
| ERRA_forskolin__Stanford          | 2.05           | 0.079         | 1.03          | 0.477        |
| EZH2_39875_None__Broad            | 1.7            | 0.004         | 0.41          | 1            |
| FOSL2_None__HudsonAlpha           | 1.56           | 0.001         | 0.94          | 0.852        |

|                                   |      |          |      |          |
|-----------------------------------|------|----------|------|----------|
| FOXA1_SC.101058_None__HudsonAlpha | 1.68 | 1.00E-04 | 1.79 | 4.00E-27 |
| FOXA1_SC.6553_None__HudsonAlpha   | 1.76 | 2.00E-05 | 1.83 | 2.00E-29 |
| FOXA2_SC.6554_None__HudsonAlpha   | 1.77 | 1.00E-04 | 1.96 | 5.00E-31 |
| GABP_None__HudsonAlpha            | 0.36 | 1        | 0.33 | 1        |
| GRp20_forskolin__Stanford         | 0.24 | 0.986    | 0.2  | 1        |
| HDAC2_SC.6296_None__HudsonAlpha   | 1.4  | 0.01     | 1.17 | 0.003    |
| HNF4A_forskolin__Stanford         | 1.4  | 0.064    | 1.62 | 4.00E-10 |
| HNF4A_SC.8987_None__HudsonAlpha   | 1.8  | 8.00E-04 | 2    | 3.00E-23 |
| HNF4G_SC.6558_None__HudsonAlpha   | 1.67 | 0.002    | 1.65 | 4.00E-14 |
| HSF1_forskolin__Stanford          | 0    | 1        | 0.39 | 1        |
| IRF3_None__Stanford               | 0.26 | 0.979    | 0.11 | 1        |
| JunD_None__HudsonAlpha            | 1.16 | 0.163    | 0.81 | 0.999    |
| JunD_None__Stanford               | 1.81 | 2.00E-04 | 1.01 | 0.482    |
| MafF_M8194_None__Stanford         | 1.21 | 0.24     | 1.81 | 2.00E-12 |
| MafK_ab50322_None__Stanford       | 1.41 | 0.076    | 1.64 | 4.00E-09 |
| MafK_SC.477_None__Stanford        | 1.37 | 0.109    | 1.58 | 1.00E-07 |
| Max_None__Stanford                | 0.72 | 0.987    | 0.45 | 1        |
| MAZ_ab85725_None__Stanford        | 0.88 | 0.835    | 0.4  | 1        |
| MBD4_SC.271530_None__HudsonAlpha  | 1.04 | 0.472    | 1.13 | 0.11     |
| Mxi1_AF4185_None__Stanford        | 0.74 | 0.995    | 0.6  | 1        |
| MYBL2_SC.81192_None__HudsonAlpha  | 1.01 | 0.486    | 0.99 | 0.56     |
| NFIC_SC.81335_None__HudsonAlpha   | 1.42 | 0.01     | 1.19 | 0.002    |
| Nrf1_None__Stanford               | 0    | 1        | 0.05 | 1        |
| NRSF_None__HudsonAlpha            | 0.85 | 0.871    | 0.3  | 1        |
| p300_None__HudsonAlpha            | 1.55 | 0.002    | 1.59 | 7.00E-16 |
| p300_SC.584_None__Stanford        | 1.52 | 0.029    | 0.98 | 0.594    |
| PGC1A_forskolin__Stanford         | 0.95 | 0.604    | 0.93 | 0.668    |
| Pol2.4H8_None__HudsonAlpha        | 0.71 | 0.998    | 0.44 | 1        |
| Pol2_forskolin__Stanford          | 0.82 | 0.963    | 0.38 | 1        |
| Pol2_None__HudsonAlpha            | 0.76 | 0.996    | 0.46 | 1        |
| Pol2_None__Stanford               | 0.84 | 0.937    | 0.45 | 1        |
| Pol2_None__UT.A                   | 0.71 | 0.997    | 0.38 | 1        |
| Pol2phosphoS2_None__Stanford      | 0.72 | 0.893    | 0.36 | 1        |
| Rad21_None__HudsonAlpha           | 1.71 | 1.00E-06 | 1.09 | 0.042    |
| Rad21_None__Stanford              | 1.78 | 2.00E-06 | 1.16 | 0.004    |
| RFX5_200.401.194_None__Stanford   | 0.59 | 0.989    | 0.37 | 1        |
| RXRA_None__HudsonAlpha            | 1.78 | 3.00E-04 | 1.59 | 8.00E-12 |
| Sin3Ak.20_None__HudsonAlpha       | 0.7  | 0.998    | 0.52 | 1        |
| SMC3_ab9263_None__Stanford        | 1.79 | 2.00E-05 | 1.55 | 4.00E-15 |
| SP1_None__HudsonAlpha             | 1.11 | 0.237    | 1.07 | 0.099    |
| SP2_SC.643_None__HudsonAlpha      | 0.38 | 0.986    | 0.25 | 1        |
| SRF_None__HudsonAlpha             | 0.56 | 0.966    | 0.58 | 1        |
| TAF1_None__HudsonAlpha            | 0.63 | 1        | 0.29 | 1        |
| TBP_None__Stanford                | 0.7  | 0.994    | 0.48 | 1        |

|                                   |      |          |      |          |
|-----------------------------------|------|----------|------|----------|
| TCF12_None__HudsonAlpha           | 1.5  | 0.279    | 2.3  | 5.00E-06 |
| TCF7L2_None__USC                  | 2.3  | 0.051    | 2.47 | 6.00E-07 |
| TEAD4_SC.101184_None__HudsonAlpha | 2.59 | 1.00E-09 | 1.39 | 1.00E-05 |
| TR4_None__USC                     | 0.33 | 0.999    | 0.26 | 1        |
| USF.1_None__HudsonAlpha           | 1    | 0.533    | 0.88 | 0.97     |
| USF2_None__Stanford               | 0.91 | 0.673    | 0.7  | 1        |
| YY1_SC.281_None__HudsonAlpha      | 0.71 | 0.997    | 0.38 | 1        |
| ZBTB33_None__HudsonAlpha          | 0.56 | 0.955    | 0.25 | 1        |
| ZBTB7A_SC.34508_None__HudsonAlpha | 1.38 | 0.033    | 0.63 | 1        |
| ZNF274_None__USC                  | 0    | 1        | 0    | 1        |

**Table S3:** Table lists the Odds Ratios (OR) and P-values of enrichment (Fisher-test) of transcription factor binding sites, as obtained in the HepG2 cell-line, for two different classes of DMRs: those hypomethylated in hESCs compared to liver-tissue (hypoM-hESC) and those hypomethylated in liver tissue compared to hESCs (hypoM-LIV).

| TF                              | OR(hyperM) | P(hyperM) | OR(hypoM) | P(hypoM) |
|---------------------------------|------------|-----------|-----------|----------|
| ATF2_SC.81188_None__HudsonAlpha | 1.9        | 4.00E-09  | 1.03      | 0.343    |
| ATF3_None__HudsonAlpha          | 2.62       | 1.00E-15  | 0.65      | 1        |
| Bach1_sc.14700_None__Stanford   | 3.3        | 4.00E-51  | 0.78      | 1        |
| BCL11A_None__HudsonAlpha        | 1.78       | 0.107     | 1.11      | 0.392    |
| BRCA1_A300.000A_None__Stanford  | 3          | 3.00E-13  | 0.61      | 1        |
| CEBPB_None__Stanford            | 2.1        | 7.00E-09  | 1.06      | 0.283    |
| CHD1_A301.218A_None__Broad      | 4.35       | 1.00E-96  | 0.67      | 1        |
| CHD1_A301.218A_None__Stanford   | 3.22       | 1.00E-17  | 0.5       | 1        |
| CHD2_AB68301_None__Stanford     | 2.71       | 2.00E-29  | 0.53      | 1        |
| c.Jun_None__Stanford            | 2.75       | 1.00E-06  | 0.96      | 0.604    |
| c.Myc_None__Stanford            | 2.65       | 8.00E-19  | 0.78      | 0.995    |
| c.Myc_None__UT.A                | 1.75       | 0.137     | 0.19      | 1        |
| CtBP2_None__USC                 | 7.47       | 1E-230    | 0.65      | 1        |
| CTCF_None__Broad                | 2.62       | 1.00E-51  | 1.37      | 2.00E-12 |
| CTCF_None__UT.A                 | 2.93       | 1.00E-51  | 1.18      | 0.001    |
| CTCF_SC.5916_None__HudsonAlpha  | 2.91       | 4.00E-54  | 1.36      | 7.00E-10 |
| Egr.1_None__HudsonAlpha         | 3.99       | 3.00E-73  | 0.51      | 1        |
| EZH2_39875_None__Broad          | 14.27      | <1E-500   | 0.22      | 1        |
| FOSL1_SC.183_None__HudsonAlpha  | 4.01       | 1.00E-10  | 0.5       | 0.998    |
| GABP_None__HudsonAlpha          | 3.46       | 1.00E-41  | 0.7       | 1        |
| GTF2F1_AB28179_None__Stanford   | 2.82       | 1.00E-21  | 0.47      | 1        |
| HDAC2_SC.6296_None__HudsonAlpha | 4.77       | 2.00E-52  | 0.6       | 1        |
| JARID1A_ab26049_None__Broad     | 1.75       | 0.002     | 0.36      | 1        |
| JunD_None__HudsonAlpha          | 3.37       | 1.00E-39  | 0.53      | 1        |
| JunD_None__Stanford             | 2.9        | 6.00E-27  | 0.87      | 0.956    |

|                                   |       |           |      |          |
|-----------------------------------|-------|-----------|------|----------|
| MafK_ab50322_None__Stanford       | 1.65  | 0.005     | 1.32 | 0.011    |
| Max_None__USC                     | 4.54  | 3.00E-98  | 0.77 | 1        |
| Mxi1_AF4185_None__Stanford        | 3.75  | 3.00E-58  | 0.64 | 1        |
| NANOG_SC.33759_None__HudsonAlpha  | 3.25  | 2.00E-12  | 0.75 | 0.97     |
| Nrf1_None__Stanford               | 3.19  | 6.00E-30  | 0.38 | 1        |
| NRSF_None__HudsonAlpha            | 7.68  | 3.00E-117 | 0.52 | 1        |
| p300_None__HudsonAlpha            | 3.22  | 2.00E-38  | 0.73 | 1        |
| Pol2.4H8_None__HudsonAlpha        | 2.35  | 2.00E-40  | 0.53 | 1        |
| Pol2_None__HudsonAlpha            | 2.55  | 3.00E-63  | 0.63 | 1        |
| Pol2_None__UT.A                   | 2.54  | 5.00E-47  | 0.52 | 1        |
| POU5F1_SC.9081_None__HudsonAlpha  | 2.64  | 1.00E-04  | 0.24 | 1        |
| Rad21_None__HudsonAlpha           | 3.07  | 7.00E-78  | 1.36 | 2.00E-12 |
| Rad21_None__Stanford              | 2.81  | 1.00E-49  | 1.5  | 1.00E-16 |
| RBBP5_A300.109A_None__Broad       | 4.89  | 2.00E-246 | 0.61 | 1        |
| RFX5_200.401.194_None__Stanford   | 2.95  | 2.00E-07  | 0.97 | 0.59     |
| RXRA_None__HudsonAlpha            | 2.25  | 0.004     | 1.16 | 0.277    |
| Sin3Ak.20_None__HudsonAlpha       | 3.89  | 3.00E-76  | 0.59 | 1        |
| SIN3A_NB600.1263_None__Stanford   | 3.58  | 2.00E-141 | 0.78 | 1        |
| SIX5_None__HudsonAlpha            | 1.97  | 6.00E-06  | 0.38 | 1        |
| SP1_None__HudsonAlpha             | 2.51  | 5.00E-34  | 0.6  | 1        |
| SP2_SC.643_None__HudsonAlpha      | 2.21  | 4.00E-08  | 0.42 | 1        |
| SP4_V.20_None__HudsonAlpha        | 2.21  | 1.00E-19  | 0.79 | 1        |
| SRF_None__HudsonAlpha             | 2     | 9.00E-06  | 0.44 | 1        |
| SUZ12_None__USC                   | 14.74 | 8.00E-238 | 0.18 | 1        |
| TAF1_None__HudsonAlpha            | 3.37  | 8.00E-123 | 0.53 | 1        |
| TAF7_SC.101167_None__HudsonAlpha  | 3.44  | 5.00E-73  | 0.46 | 1        |
| TBP_None__Stanford                | 3.47  | 2.00E-113 | 0.56 | 1        |
| TCF12_None__HudsonAlpha           | 4.09  | 1.00E-39  | 0.69 | 1        |
| TEAD4_SC.101184_None__HudsonAlpha | 2.9   | 3.00E-33  | 0.79 | 0.999    |
| USF.1_None__HudsonAlpha           | 3     | 3.00E-44  | 0.83 | 0.996    |
| USF2_None__Stanford               | 2.77  | 2.00E-20  | 0.61 | 1        |
| YY1_SC.281_None__HudsonAlpha      | 3.14  | 8.00E-64  | 0.66 | 1        |
| Znf143_16618.1.AP_None__Stanford  | 3.33  | 2.00E-84  | 1.3  | 2.00E-08 |

**Table S4:** Table lists the Odds Ratios (OR) and P-values of enrichment of transcription factor binding sites, as obtained in the H1-hESC line, among age-hypermethylated and age-hypomethylated DMRs.
